# Supplementary material for: Determination of porphyrins in oral bacteria by liquid chromatography electrospray ionization tandem mass spectrometry
Source: PubMed Central journal article supplement (PMC4551553; doi:10.1007/s00216-015-8864-2), 2015-07-14
Supplement: 216_2015_8864_MOESM1_ESM.pdf [file 216_2015_8864_MOESM1_ESM.pdf]

## **Analytical and Bioanalytical Chemistry**

### **Electronic Supplementary Material**

#### **Determination of porphyrins in oral bacteria by liquid chromatography electrospray ionization tandem mass spectrometry**

Jonas Fyrestam, Nadja Bjurshammar, Elin Paulsson, Annsofi Johannsen, Conny Östman

**Table S1** Linear regression equation and R2 values for porphyrins using a calibration curve for selected porphyrins between 50-900 pmol/mL

| Porphyrin             | Linear regression equation | Coefficient of determination R <sup>2</sup> |
|-----------------------|----------------------------|---------------------------------------------|
| Uroporphyrin I        | Y = 27 x                   | 0.995                                       |
| 7-carboxylporphyrin I | Y = 70 x                   | 0.987                                       |
| 6-carboxylporphyrin I | Y = 190 x                  | 0.999                                       |
| 5-carboxylporphyrin I | Y = 380 x                  | 0.998                                       |
| Coproporphyrin I      | Y = 490 x                  | 0.999                                       |
| Mesoporphyrin IX      | Y = 830 x                  | 0.997                                       |
| Protoporphyrin IX     | Y = 1 200 x                | 0.988                                       |

<sup>y</sup> = area in cps

<sup>x</sup> = concentration in pmol/mL

**Table S2** CV% for retention time and area at six different concentration levels of the standard solution (n=18)

| Porphyrin             | Retention time | Area |
|-----------------------|----------------|------|
|                       | CV%            | CV%  |
| Uroporphyrin I        | 1.0            | 7.3  |
| 7-carboxylporphyrin I | 0.9            | 9.4  |
| 6-carboxylporphyrin I | 0.4            | 6.2  |
| 5-carboxylporphyrin I | 0.3            | 3.4  |
| Coproporphyrin I      | 0.2            | 3.6  |
| Mesoporphyrin IX      | 0.1            | 2.8  |
| Protoporphyrin IX     | 0.1            | 4.3  |
